# Supplementary material for: Diversity, Enzyme Production and Antibacterial Activity of Bacillus Resource in Sesame-Flavored Liquor Daqu
Source: Research Square preprint supplement (doi:10.21203/rs.3.rs-251442/v1), 2021-05-07
Supplement: Supplementary file 1 [file 9a468d67eb3fcc3289773551.docx]

**Supplemrntary** **Table 1** Annealing temperature of biocontrol gene

|  | srfAA | srfAB | ituC | fenD | bmyB | bioA | yndJ | yndG |
| --- | --- | --- | --- | --- | --- | --- | --- | --- |
| B1 | 45 | 45 | 52 | 45 | 62 | 64 | 54 | 45 |
| YPDW9 | 50 | 50 | 52 | 50 | 62 | 64 | 54 | 45 |
| W7 | 64 | 58 | 52 | 52 | 64 | 64 | 54 | 45 |
| W13 | 62 | 58 | 52 | 52 | 64 | 64 | 54 | 45 |
| Y14 | 45 | 45 | 45 | 45 | 45 | 64 | 54 | 45 |
| Y15 | 45 | 45 | 45 | 45 | 45 | 64 | 54 | 45 |
| YPDW6 | 45 | 45 | 45 | 45 | 45 | 64 | 54 | 45 |
| YPDW12 | 50 | 50 | 50 | 50 | 50 | 64 | 54 | 45 |
| W14 | 62 | 62 | 52 | 52 | 62 | 64 | 54 | 45 |
| Y5 | 62 | 62 | 52 | 52 | 62 | 64 | 54 | 45 |
| YPDW1 | 62 | 62 | 52 | 52 | 62 | 64 | 54 | 45 |

Note: The unit of number in the table is ℃.

**Supplementary Table 2** Statistics of enzyme production by *Bacillus*

| Strain number | Protease | Amylase |
| --- | --- | --- |
| B1 | + | + |
| B2 | + | + |
| B5 | - | - |
| W4 | + | + |
| W6 | + | + |
| W7 | + | + |
| W12 | + | + |
| W13 | + | + |
| W14 | + | + |
| W15 | + | + |
| W17 | - | - |
| W21 | - | - |
| W22 | + | - |
| Y1 | - | - |
| Y5 | + | + |
| Y7 | + | - |
| Y9 | - | - |
| Y10 | + | + |
| Y14 | + | + |
| Y15 | + | + |
| Y17 | - | - |
| Y18 | - | -- |
| YPDW1 | + | + |
| YPDW5 | - | - |
| YPDW6 | + | + |
| YPDW8 | + | + |
| YPDW9 | + | + |
| YPDW11 | + | + |
| YPDW12 | + | + |
| YPDY3 | + | + |
| YPDY4 | + | + |
| YPDY5 | - | - |
| K1 | + | + |

Note: "+" means it has enzyme production activity, and "-" means it has no enzyme production activity.
